# Supplementary material
Source: HighWire-hosted journal article supplement (https://erj.ersjournals.com/content/58/4/2004307)
Supplement: inline-supplementary-material-2 [file inline-supplementary-material-2.pdf]

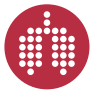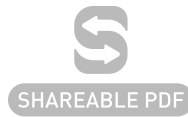

# Referral criteria to palliative care for patients with respiratory disease: a systematic review

Jennifer Philip <sup>1,2</sup>, Anna Collins<sup>1</sup>, Natasha Smallwood <sup>1,3</sup>, Yuchieh Kathryn Chang<sup>4</sup>, Li Mo<sup>4,5</sup>, Ian A. Yang<sup>6,7</sup>, Tamera Corte<sup>8,9,10</sup>, Christine F. McDonald<sup>1,11,12</sup> and David Hui<sup>4</sup>

<sup>1</sup>Dept of Medicine, University of Melbourne, Parkville, Australia. <sup>2</sup>Palliative Care Service, St Vincent's Hospital, Fitzroy, Australia. <sup>3</sup>Dept of Respiratory and Sleep Medicine, Royal Melbourne Hospital, Parkville, Australia. <sup>4</sup>Dept of Palliative Care, Rehabilitation and Integrative Medicine, MD Anderson Cancer Center, Houston, TX, USA. <sup>5</sup>The Center of Gerontology and Geriatrics, National Clinical Research Center of Geriatrics, West China Hospital, Sichuan University, Chengdu, China. <sup>6</sup>Thoracic Program, The Prince Charles Hospital, Metro North Hospital and Health Service, Brisbane, Australia. <sup>7</sup>UQ Thoracic Research Centre, Faculty of Medicine, The University of Queensland, Brisbane, Australia. <sup>8</sup>Respiratory Medicine, Royal Prince Alfred Hospital, Camperdown, Australia. <sup>9</sup>Dept of Medicine, University of Sydney, Sydney, Australia. <sup>10</sup>Centre of Research Excellence in Pulmonary Fibrosis, National Health and Medical Research Council, Royal Prince Alfred Hospital, Camperdown, Australia. <sup>11</sup>Dept of Respiratory and Sleep Medicine, Austin Health, Heidelberg, Australia. <sup>12</sup>Institute for Breathing and Sleep, Heidelberg, Australia.

Corresponding author: Jennifer Philip ([jphilip@unimelb.edu.au](mailto:jphilip@unimelb.edu.au))

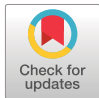

Shareable abstract (@ERSpublications)

This systematic review reveals there are multiple different criteria currently used to prompt referral to palliative care, suggesting a lack of consensus around this practice and highlighting the need to establish agreed criteria going forward <https://bit.ly/38H7W3i>

**Cite this article as:** Philip J, Collins A, Smallwood N, *et al.* Referral criteria to palliative care for patients with respiratory disease: a systematic review. *Eur Respir J* 2021; 58: 2004307 [DOI: 10.1183/13993003.04307-2020].

This single-page version can be shared freely online.

Copyright ©The authors 2021. For reproduction rights and permissions contact [permissions@ersnet.org](mailto:permissions@ersnet.org)

This article has supplementary material available from [erj.ersjournals.com](http://erj.ersjournals.com)

Received: 24 Nov 2020  
Accepted: 6 March 2021

## Abstract

**Aims** Advanced nonmalignant respiratory diseases are associated with significant patient morbidity, yet access to palliative care occurs late, if at all. Our aim was to examine referral criteria for palliative care among patients with advanced nonmalignant respiratory disease, with a view to developing a standardised set of referral criteria.

**Methods** We performed a systematic review of all studies reporting on referral criteria to palliative care in advanced nonmalignant respiratory disease, with a focus on chronic obstructive pulmonary disease and interstitial lung disease. The systematic review was conducted and reported according to the PRISMA guidelines, and was undertaken using electronic databases (Ovid, MEDLINE, Ovid Embase and PubMed).

**Results** Searches yielded 2052 unique titles, which were screened for eligibility and resulted in 62 studies addressing referral criteria to palliative care in advanced nonmalignant respiratory disease. Of 18 categories put forward for referral to palliative care, the most commonly discussed factors were hospital use (69% of papers), indicators of poor respiratory status (47%), physical and emotional symptoms (37%), functional decline (29%), need for advanced respiratory therapies (27%), and disease progression (26%).

**Conclusion** Clinicians consider referral to specialist palliative care for a wide range of disease- and needs-based criteria. Our findings highlight the need to standardise palliative care access by developing consensus referral criteria for patients with advanced nonmalignant respiratory illnesses.
